# Supplementary material for: Inflammation-sensitive in situ smart scaffolding for regenerative medicine
Source: Royal Society of Chemistry journal article supplement (doi:10.1039/c6nr06157e), 2016-01-01
Supplement: c6nr06157e1.pdf [file c6nr06157e1.pdf]

## Supplementary information

# Inflammation-sensitive *in situ* smart scaffolding for regenerative medicine

Hirak K Patra,<sup>a,b†</sup> Yashpal Sharma,<sup>c†</sup> Mohammad Mirazul Islam,<sup>d</sup> Mohammad Javad Jafari,<sup>e</sup> N. Arul Murugan,<sup>f</sup> Hisatoshi Kobayashi,<sup>c</sup> Anthony P.F. Turner<sup>a</sup> and Ashutosh Tiwari<sup>a,c,g,h\*</sup>

<sup>a</sup>Biosensors and Bioelectronics Centre, Department of Physics, Chemistry and Biology (IFM), Linköping University, S-58183, Linköping, Sweden

<sup>b</sup>Department of Cell Biology, Experimental and Clinical Medicine (IKE), Linköping University, S-58185, Linköping, Sweden

<sup>c</sup>International Center for Materials Nanoarchitectonics, National Institute for Materials Science (NIMS), 1-2-1, Sengen, Tsukuba, Ibaraki 305-0047, Japan

<sup>d</sup>Swedish Nanoscience Center, Karolinska Institute, S-171 77 Stockholm, Sweden

<sup>e</sup>Division of Molecular Physics, Department of Physics, Chemistry and Biology (IFM), Linköping University, Sweden

<sup>f</sup>Virtual Laboratory for Molecular Probes, Division of Theoretical Chemistry and Biology, School of Biotechnology, Royal Institute of Technology (KTH), S-106 91 Stockholm, Sweden.

<sup>g</sup>Tekidag AB, UCS, Teknikringen 4A, Mjärdevi Science Park, Linköping 58330, Sweden

<sup>h</sup>Vinoba Bhave Research Institute, Sirsa Road, Saidabad, Allahabad 221508, India

† Contributed equally.

\*Corresponding author. E-mail: [ashutosh.tiwari@liu.se](mailto:ashutosh.tiwari@liu.se), Tel: (+46) 13-28-2395 and Fax: (+46) 13-13-7568.

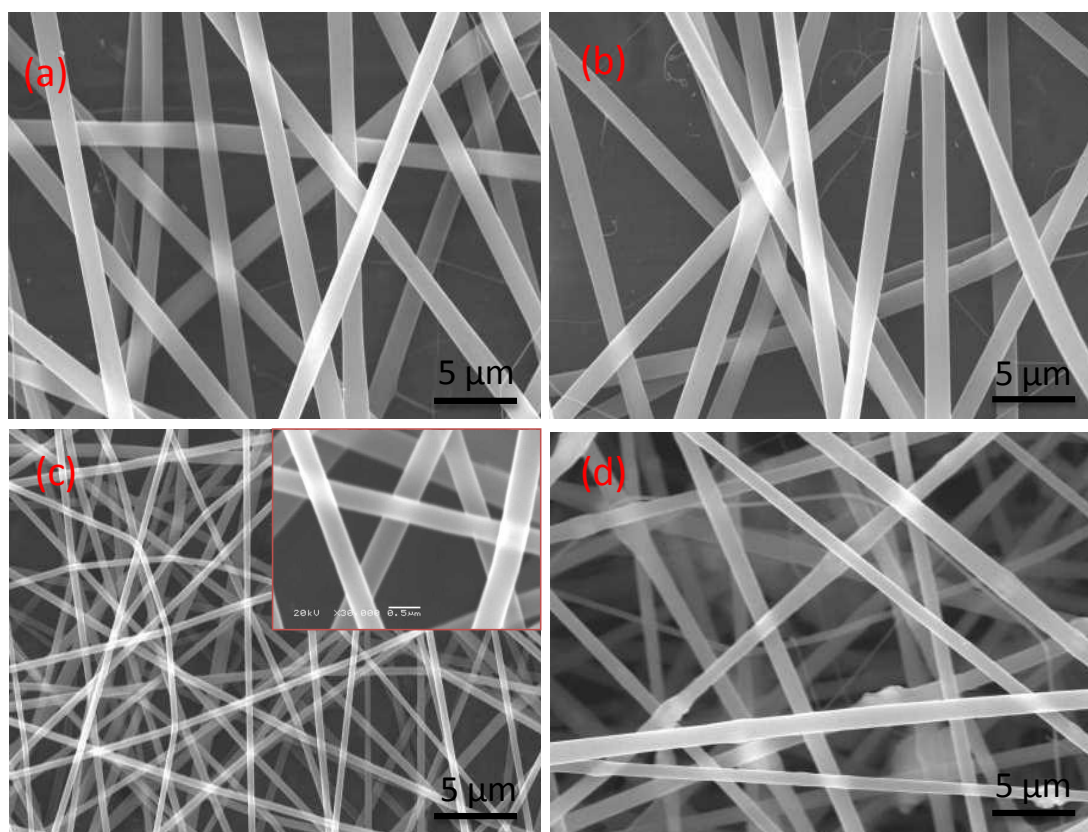

**Fig. S1.** SEM images of fibers electrospun from the PNIPAm solution having different concentrations of (a) 18, (b) 20, (c) 22 and (d) 24 wt%. In inset the fibers with thinnest diameter is shown at higher resolution. The optimum concentration to obtain fiber with thinnest diameter is 22 wt%. Scale bar 5  $\mu\text{m}$ .

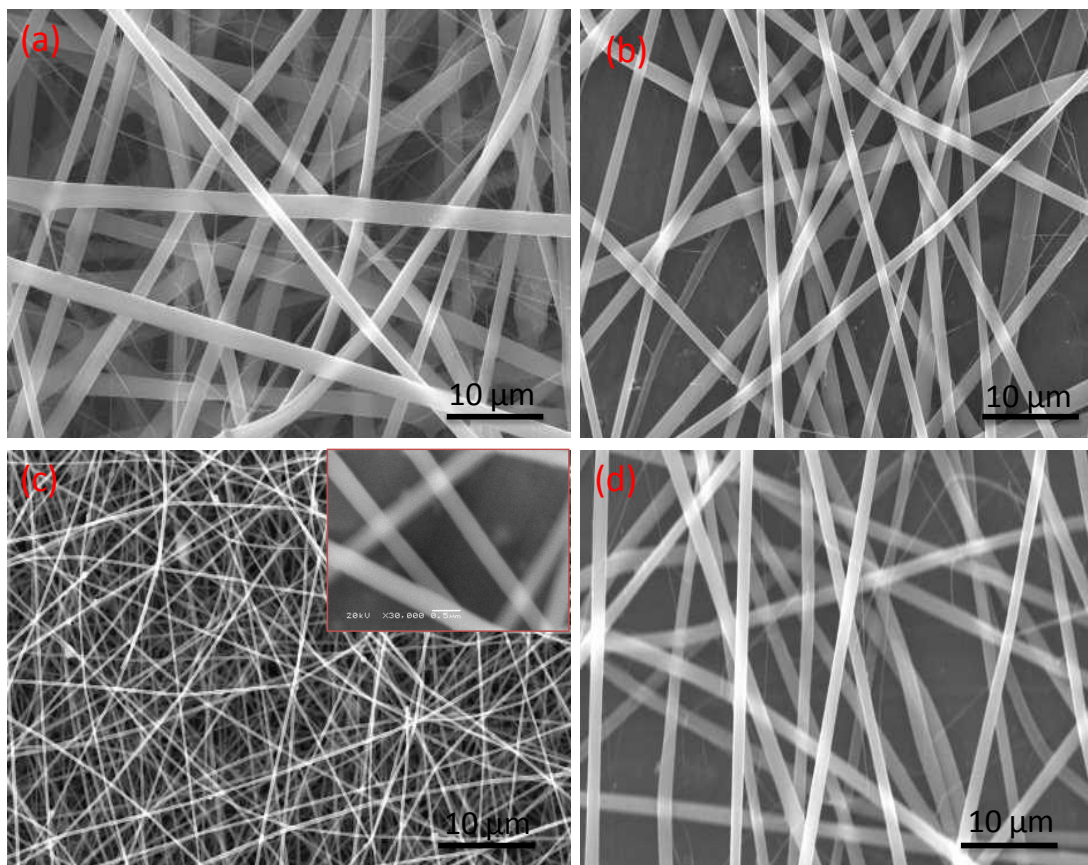

**Fig. S2.** SEM images of fibers electrospun from the PANI-CNT composite solution having different concentrations of (a) 18, (b) 20, (c) 22 and (d) 24 wt%. In inset the fibers with thinnest diameter is shown at higher resolution. The optimum concentration to obtain fiber with thinnest diameter is 22 wt%. Scale bar 10  $\mu\text{m}$ .

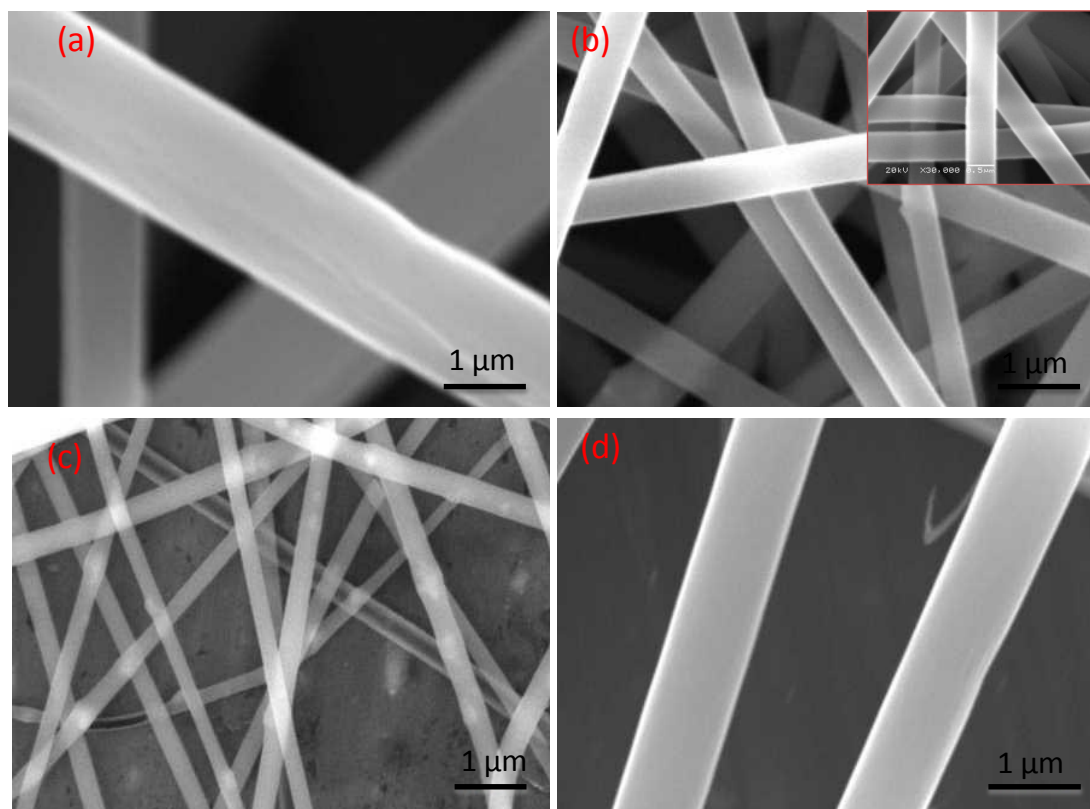

**Fig. S3.** SEM images of fibers electrospun from the PANI-CNT/PNIPAm hybrid composite solution having different concentrations of (a) 18, (b) 20, (c) 22 and (d) 24 wt%. In inset the fibers with thinnest diameter is shown at higher resolution. The optimum concentration to obtain fiber with thinnest diameter is 20 wt%. Scale bar 1 μm.

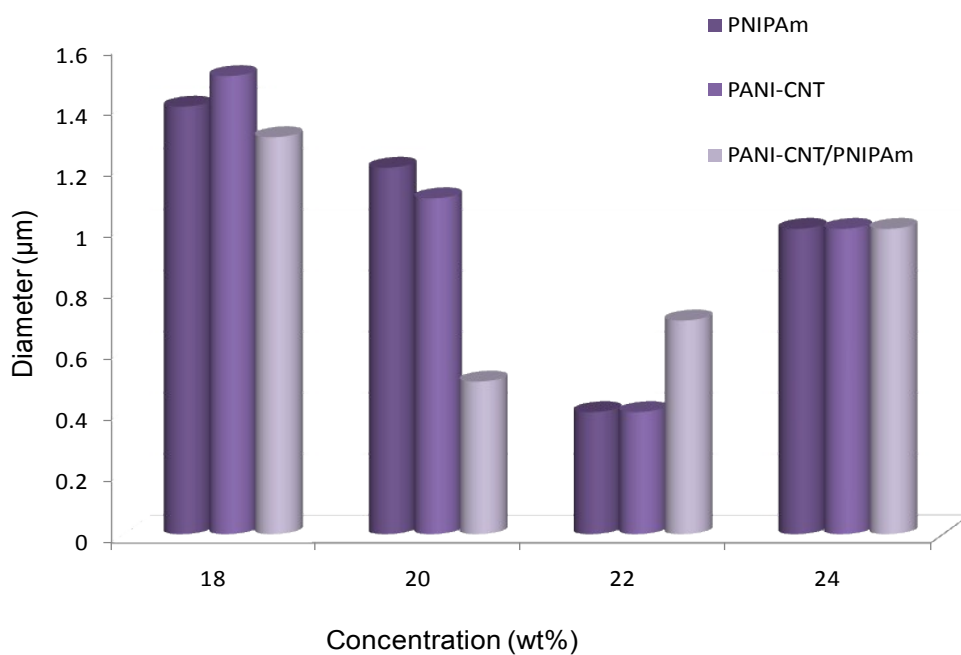

**Fig. S4.** Histogram indicating the diameter of the different polymeric nanofibers at different concentrations.
